# Supplementary material
Source: MDPI journal article supplement (https://www.mdpi.com/2075-163X/12/2/274)
Supplement: s1 [file s1]

Supplementary Materials

# Columnar structure of claw denticles in the coconut crab, *Birgus latro*

Tadanobu Inoue, Shin-ichiro Oka, Koji Nakazato and Toru Hara

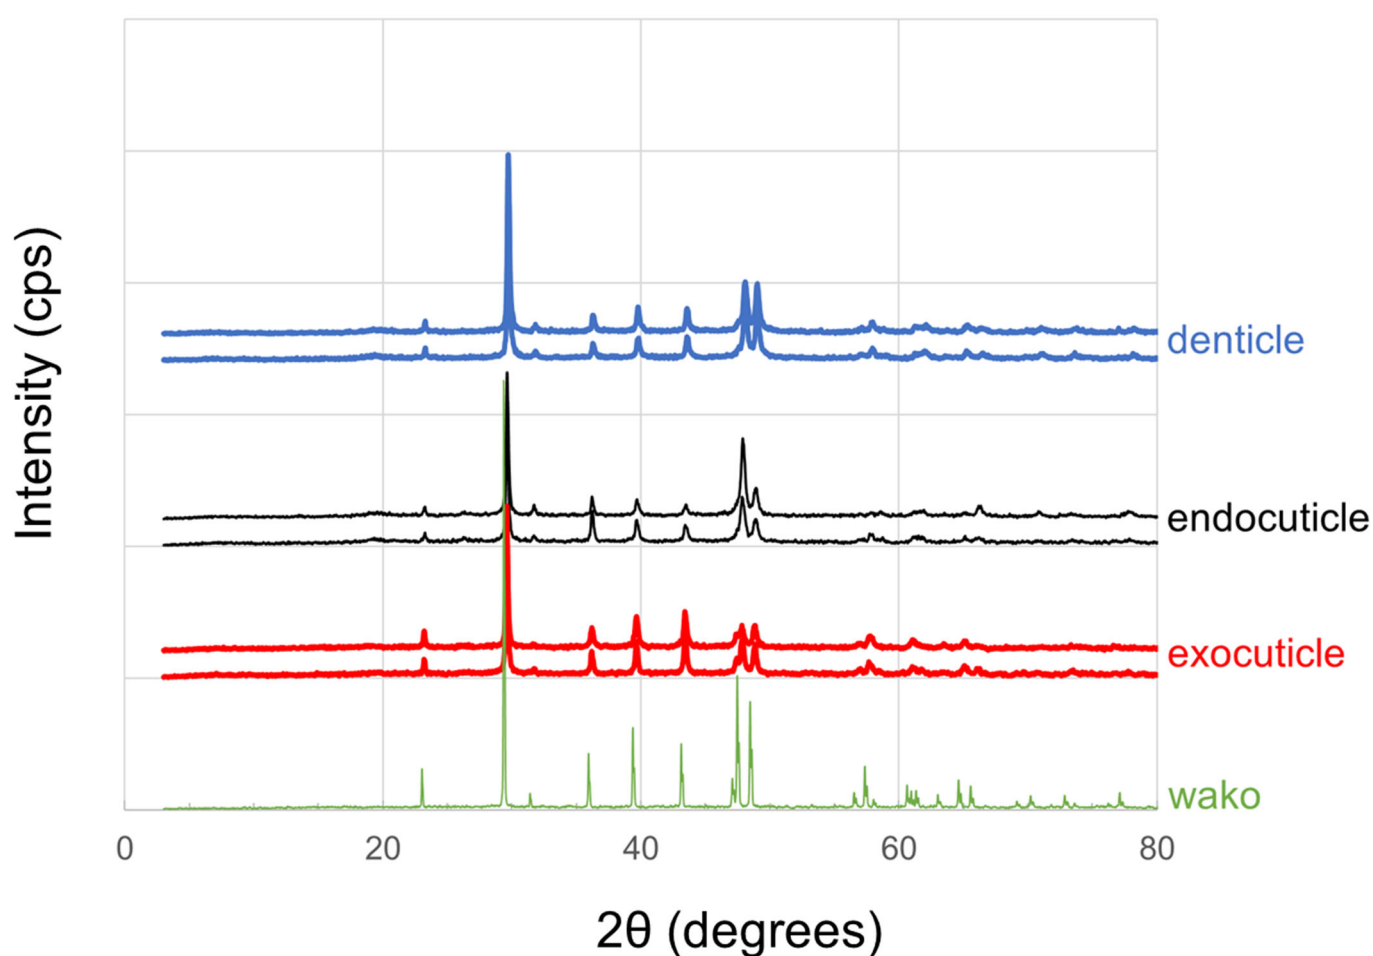

**Figure S1.** X-ray diffraction (XRD) patterns of the denticle, exocuticle and endocuticle of the claw of male coconut crab (body weight: 610 g, thoracic length: 44.5 mm), including the standard x-ray diffraction of the calcite crystal, wako (FUJIFILM Wako Pure Chemical Co.). Here, XRD analysis at two positions for each layer was performed using commercial X-ray diffractometer SmartLab (Rigaku Co. Ltd., Tokyo, Japan).

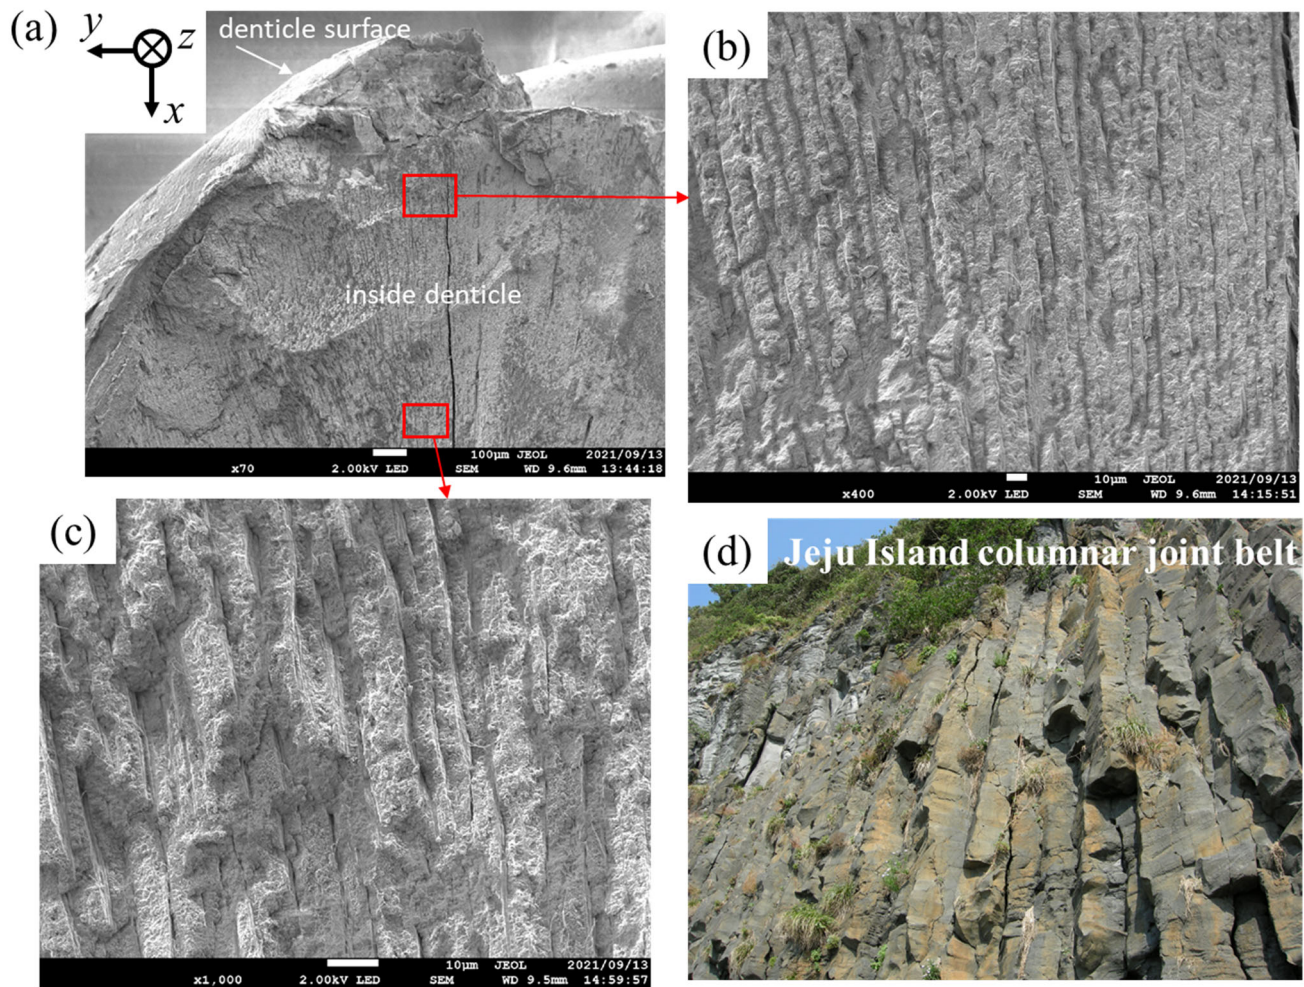

**Figure S2.** SEM micrograph of (a) a fracture surface of the denticle. (b,c) Enlarged SEM micrographs of the area enclosed by rectangles in (a). (d) A columnar joint belt on a Jeju Island, photographed in 2007 by one in the authors, T. Inoue.

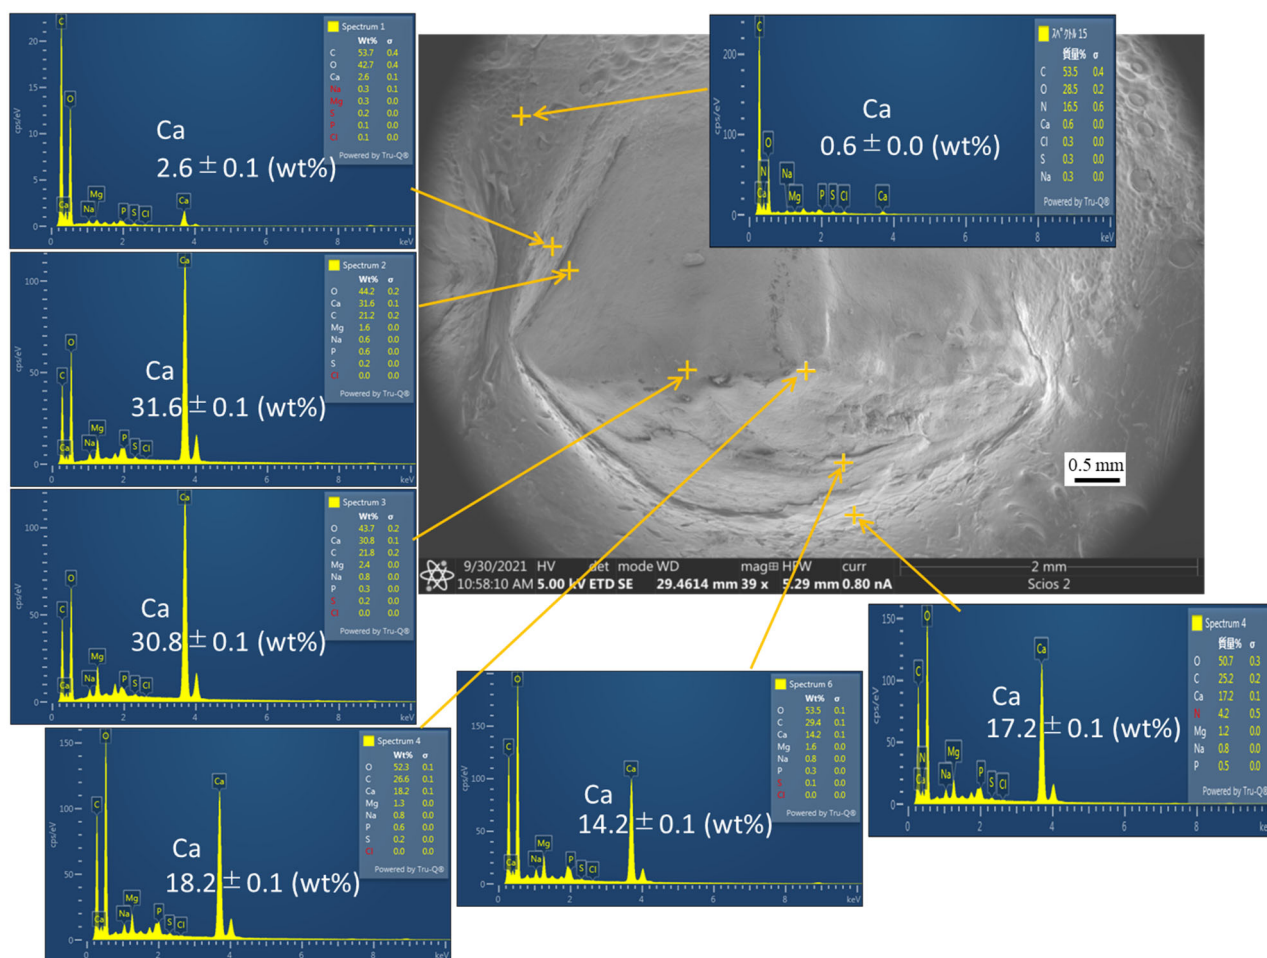

**Figure S3.** SEM micrograph of the denticle surface shown in Fig. 5(c) and the point spectrum at some sites measured by energy-dispersive X-ray spectroscopy (EDS).



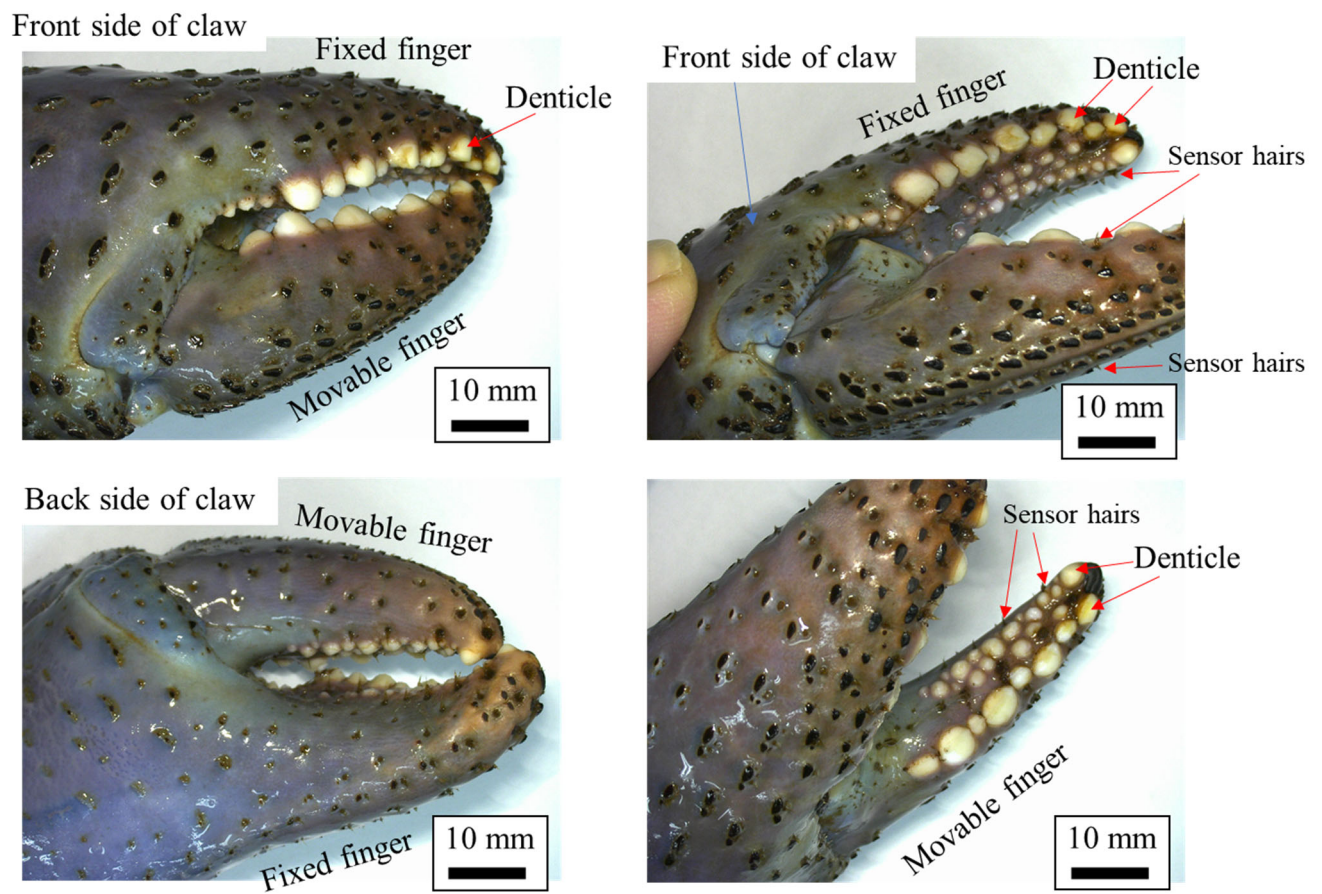

**Figure S4.** Heterogeneous/irregular denticles (white) of the left claw's fixed finger of the coconut crab of male (body weight: 1150 g, thoracic length: 52.7 mm).
